# Supplementary material for: Syntheses, structural studies, photoelectron spectra and density functional theory calculations of the “pseudo” tetraphospha-metallocenes [M(η-P2C3But3)2], (M = Ni, Pd, Pt)
Source: Royal Society of Chemistry journal article supplement (doi:10.1039/b815255a), 2008-12-19
Supplement: b815255a.pdf [file b815255a.pdf]

## SUPPORTING INFORMATION

### **Syntheses, Structural studies, Photoelectron spectra and Density Functional Theory calculations on the "pseudo" tetraphospha-metalloenes [M( $\eta$ -P<sub>2</sub>C<sub>3</sub>But<sub>3</sub>)<sub>2</sub>], (M= Ni, Pd, Pt).**

**F. Geoffrey N. Cloke<sup>\*a</sup>, Jennifer C. Green<sup>\*b</sup>, Peter B. Hitchcock<sup>a</sup>,  
John F. Nixon<sup>\*a</sup>, James L. Suter<sup>b</sup> and D. James Wilson<sup>a</sup>**

*<sup>a</sup> Department of Chemistry, School of Life Sciences, University of Sussex,  
Falmer, Brighton, Sussex BN1 9QJ, UK; <sup>b</sup> University of Oxford, Inorganic Chemistry  
Laboratory, South Parks Road, Oxford OX1 3QR, UK*

**Table 1. Crystal data and structure refinement for  
[Pt(P2C3tBu3)2]**

|                                   |                                                   |                 |
|-----------------------------------|---------------------------------------------------|-----------------|
| Identification code               | aug499                                            |                 |
| Empirical formula                 | C <sub>30</sub> H <sub>54</sub> P <sub>4</sub> Pt |                 |
| Formula weight                    | 733.70                                            |                 |
| Temperature                       | 293(2) K                                          |                 |
| Wavelength                        | 0.71073 Å                                         |                 |
| Crystal system                    | Monoclinic                                        |                 |
| Space group                       | P2 <sub>1</sub> /n (No.14)                        |                 |
| Unit cell dimensions              | a = 14.4887(4) Å                                  | α = 90°.        |
|                                   | b = 15.3795(4) Å                                  | β = 96.988(2)°. |
|                                   | c = 15.2504(4) Å                                  | γ = 90°.        |
| Volume                            | 3372.99(16) Å <sup>3</sup>                        |                 |
| Z                                 | 4                                                 |                 |
| Density (calculated)              | 1.45 Mg/m <sup>3</sup>                            |                 |
| Absorption coefficient            | 4.37 mm <sup>-1</sup>                             |                 |
| F(000)                            | 1488                                              |                 |
| Crystal size                      | 0.2 x 0.15 x 0.05 mm <sup>3</sup>                 |                 |
| Theta range for data collection   | 4.14 to 27.87°.                                   |                 |
| Index ranges                      | -19 ≤ h ≤ 18, -18 ≤ k ≤ 20, -18 ≤ l ≤ 20          |                 |
| Reflections collected             | 22145                                             |                 |
| Independent reflections           | 7982 [R(int) = 0.054]                             |                 |
| Reflections with I > 2σ(I)        | 5553                                              |                 |
| Completeness to theta = 27.87°    | 99.4 %                                            |                 |
| Tmax. and Tmin.                   | 0.81, 0.58                                        |                 |
| Refinement method                 | Full-matrix least-squares on F <sub>2</sub>       |                 |
| Data / restraints / parameters    | 7982 / 0 / 316                                    |                 |
| Goodness-of-fit on F <sub>2</sub> | 1.060                                             |                 |
| Final R indices [I > 2σ(I)]       | R1 = 0.052, wR2 = 0.105                           |                 |
| R indices (all data)              | R1 = 0.086, wR2 = 0.121                           |                 |
| Largest diff. peak and hole       | 3.18 and -3.38 e.Å <sup>-3</sup> (0.7 Å from Pt)  |                 |
| Data collection KappaCCD          |                                                   |                 |
| Absorption correction Multi-scan  |                                                   |                 |
| Program package WinGX             |                                                   |                 |
| Refinement using SHELXL-97        |                                                   |                 |
| Drawing using ORTEP-3 for Windows |                                                   |                 |

Table 3. Bond lengths [Å] and angles [°] for aug499.

---

|             |           |
|-------------|-----------|
| Pt-C(3)     | 2.182(7)  |
| Pt-C(18)    | 2.207(7)  |
| Pt-P(1)     | 2.380(2)  |
| Pt-P(2)     | 2.417(3)  |
| Pt-P(3)     | 2.420(2)  |
| Pt-P(4)     | 2.468(2)  |
| P(1)-C(3)   | 1.777(7)  |
| P(1)-C(1)   | 1.861(6)  |
| P(2)-C(3)   | 1.765(6)  |
| P(2)-C(2)   | 1.844(6)  |
| P(3)-C(18)  | 1.760(7)  |
| P(3)-C(16)  | 1.832(6)  |
| P(4)-C(18)  | 1.757(7)  |
| P(4)-C(17)  | 1.820(6)  |
| C(1)-C(2)   | 1.368(9)  |
| C(1)-C(4)   | 1.555(9)  |
| C(2)-C(8)   | 1.560(9)  |
| C(3)-C(12)  | 1.517(8)  |
| C(4)-C(7)   | 1.514(11) |
| C(4)-C(6)   | 1.525(11) |
| C(4)-C(5)   | 1.539(11) |
| C(8)-C(10)  | 1.536(11) |
| C(8)-C(9)   | 1.538(11) |
| C(8)-C(11)  | 1.544(12) |
| C(12)-C(14) | 1.522(9)  |
| C(12)-C(13) | 1.525(10) |
| C(12)-C(15) | 1.527(10) |
| C(16)-C(17) | 1.383(8)  |
| C(16)-C(19) | 1.558(8)  |
| C(17)-C(23) | 1.556(9)  |
| C(18)-C(27) | 1.519(9)  |
| C(19)-C(21) | 1.514(11) |
| C(19)-C(22) | 1.524(12) |
| C(19)-C(20) | 1.535(11) |
| C(23)-C(24) | 1.538(10) |
| C(23)-C(26) | 1.538(11) |

|             |           |
|-------------|-----------|
| C(23)-C(25) | 1.543(11) |
| C(27)-C(29) | 1.524(10) |
| C(27)-C(28) | 1.527(10) |
| C(27)-C(30) | 1.543(11) |

|                  |            |
|------------------|------------|
| C(3)-Pt-C(18)    | 164.1(2)   |
| C(3)-Pt-P(1)     | 45.59(18)  |
| C(18)-Pt-P(1)    | 145.57(18) |
| C(3)-Pt-P(2)     | 44.76(17)  |
| C(18)-Pt-P(2)    | 120.42(18) |
| P(1)-Pt-P(2)     | 74.25(7)   |
| C(3)-Pt-P(3)     | 151.43(17) |
| C(18)-Pt-P(3)    | 44.41(18)  |
| P(1)-Pt-P(3)     | 108.91(7)  |
| P(2)-Pt-P(3)     | 155.55(6)  |
| C(3)-Pt-P(4)     | 128.07(18) |
| C(18)-Pt-P(4)    | 43.72(18)  |
| P(1)-Pt-P(4)     | 167.83(6)  |
| P(2)-Pt-P(4)     | 108.37(7)  |
| P(3)-Pt-P(4)     | 73.85(7)   |
| C(3)-P(1)-C(1)   | 97.7(3)    |
| C(3)-P(1)-Pt     | 61.3(2)    |
| C(1)-P(1)-Pt     | 90.2(2)    |
| C(3)-P(2)-C(2)   | 98.2(3)    |
| C(3)-P(2)-Pt     | 60.5(3)    |
| C(2)-P(2)-Pt     | 93.9(2)    |
| C(18)-P(3)-C(16) | 97.0(3)    |
| C(18)-P(3)-Pt    | 61.4(2)    |
| C(16)-P(3)-Pt    | 82.6(2)    |
| C(18)-P(4)-C(17) | 97.9(3)    |
| C(18)-P(4)-Pt    | 60.2(2)    |
| C(17)-P(4)-Pt    | 83.7(2)    |
| C(2)-C(1)-C(4)   | 135.0(6)   |
| C(2)-C(1)-P(1)   | 114.9(4)   |
| C(4)-C(1)-P(1)   | 110.0(4)   |
| C(1)-C(2)-C(8)   | 131.9(6)   |
| C(1)-C(2)-P(2)   | 113.2(4)   |
| C(8)-C(2)-P(2)   | 114.9(5)   |

|                   |          |
|-------------------|----------|
| C(12)-C(3)-P(2)   | 125.0(5) |
| C(12)-C(3)-P(1)   | 125.0(5) |
| P(2)-C(3)-P(1)    | 109.7(3) |
| C(12)-C(3)-Pt     | 124.1(5) |
| P(2)-C(3)-Pt      | 74.7(3)  |
| P(1)-C(3)-Pt      | 73.1(2)  |
| C(7)-C(4)-C(6)    | 111.6(8) |
| C(7)-C(4)-C(5)    | 103.4(7) |
| C(6)-C(4)-C(5)    | 107.1(7) |
| C(7)-C(4)-C(1)    | 117.8(6) |
| C(6)-C(4)-C(1)    | 107.8(6) |
| C(5)-C(4)-C(1)    | 108.6(6) |
| C(10)-C(8)-C(9)   | 110.8(7) |
| C(10)-C(8)-C(11)  | 107.1(8) |
| C(9)-C(8)-C(11)   | 104.7(7) |
| C(10)-C(8)-C(2)   | 112.0(6) |
| C(9)-C(8)-C(2)    | 111.6(6) |
| C(11)-C(8)-C(2)   | 110.2(6) |
| C(3)-C(12)-C(14)  | 111.3(6) |
| C(3)-C(12)-C(13)  | 106.9(6) |
| C(14)-C(12)-C(13) | 109.4(6) |
| C(3)-C(12)-C(15)  | 111.1(5) |
| C(14)-C(12)-C(15) | 109.2(6) |
| C(13)-C(12)-C(15) | 108.9(6) |
| C(17)-C(16)-C(19) | 132.2(6) |
| C(17)-C(16)-P(3)  | 115.8(5) |
| C(19)-C(16)-P(3)  | 112.1(5) |
| C(16)-C(17)-C(23) | 132.8(6) |
| C(16)-C(17)-P(4)  | 114.5(5) |
| C(23)-C(17)-P(4)  | 112.5(4) |
| C(27)-C(18)-P(4)  | 123.5(5) |
| C(27)-C(18)-P(3)  | 123.0(5) |
| P(4)-C(18)-P(3)   | 113.2(4) |
| C(27)-C(18)-Pt    | 122.5(5) |
| P(4)-C(18)-Pt     | 76.1(3)  |
| P(3)-C(18)-Pt     | 74.2(3)  |
| C(21)-C(19)-C(22) | 112.0(8) |
| C(21)-C(19)-C(20) | 106.0(8) |

|                   |          |
|-------------------|----------|
| C(22)-C(19)-C(20) | 103.7(8) |
| C(21)-C(19)-C(16) | 111.4(6) |
| C(22)-C(19)-C(16) | 112.0(7) |
| C(20)-C(19)-C(16) | 111.4(6) |
| C(24)-C(23)-C(26) | 104.1(7) |
| C(24)-C(23)-C(25) | 110.5(8) |
| C(26)-C(23)-C(25) | 106.5(7) |
| C(24)-C(23)-C(17) | 115.8(6) |
| C(26)-C(23)-C(17) | 111.5(6) |
| C(25)-C(23)-C(17) | 108.1(6) |
| C(18)-C(27)-C(29) | 111.7(6) |
| C(18)-C(27)-C(28) | 111.4(6) |
| C(29)-C(27)-C(28) | 109.8(6) |
| C(18)-C(27)-C(30) | 106.6(6) |
| C(29)-C(27)-C(30) | 109.1(6) |
| C(28)-C(27)-C(30) | 108.0(7) |

---

**Symmetry transformations used to generate equivalent atoms:**

Least-squares planes (x,y,z in crystal coordinates) and deviations from them

(\* indicates atom used to define plane)

8.0173 (0.0333) x - 6.2467 (0.0302) y + 9.9812 (0.0230) z = 1.7917  
(0.0133)

\* -0.0283 (0.0018) P1  
 \* 0.0282 (0.0018) P2  
 \* 0.0601 (0.0038) C1  
 \* -0.0599 (0.0038) C2  
 -0.4170 (0.0083) C3

Rms deviation of fitted atoms = 0.0469

12.0323 (0.0559) x - 2.4379 (0.0819) y + 6.5431 (0.0748) z = 3.4413  
(0.0275)

Angle to previous plane (with approximate esd) = 24.18 ( 0.54 )

\* 0.0000 (0.0000) P1  
 \* 0.0000 (0.0000) P2  
 \* 0.0000 (0.0000) C3  
 1.9120 (0.0019) Pt

Rms deviation of fitted atoms = 0.0000

11.0667 (0.0743) x - 3.6622 (0.0297) y + 7.6637 (0.0993) z = 6.8553

(0.0162)

Angle to previous plane (with approximate esd) = 7.05 ( 0.96 )

\* 0.0000 (0.0000) P3  
\* 0.0000 (0.0000) P4  
\* 0.0000 (0.0000) C18  
-1.9525 (0.0019) Pt

Rms deviation of fitted atoms = 0.0000

8.7505 (0.0337) x - 4.3044 (0.0232) y + 10.1756 (0.0317) z = 6.2360  
(0.0126)

Angle to previous plane (with approximate esd) = 12.67 ( 0.79 )

\* 0.0087 (0.0018) P3  
\* -0.0087 (0.0018) P4  
\* -0.0185 (0.0038) C16  
\* 0.0185 (0.0038) C17  
0.2122 (0.0083) C18

Rms deviation of fitted atoms = 0.0144

**Table 1. Crystal data and structure refinement for [Pd(P2C3tBu3)2]**

|                                  |                                                                            |
|----------------------------------|----------------------------------------------------------------------------|
| Identification code              | MAR499                                                                     |
| Empirical formula                | C <sub>30</sub> H <sub>54</sub> P <sub>4</sub> Pd                          |
| Formula weight                   | 645.0                                                                      |
| Temperature                      | 173(2) K                                                                   |
| Wavelength                       | 0.71073 Å                                                                  |
| Crystal system, space group      | Monoclinic, P2 <sub>1</sub> /c (No.14)                                     |
| Unit cell dimensions(Å and deg.) | a=11.046(3) alpha=90<br>b=28.537(9) beta=105.12(2)<br>c=16.175(5) gamma=90 |
| Volume                           | 4922(3) Å <sup>3</sup>                                                     |
| Z, Calculated density            | 6, 1.31 Mg.m <sup>-3</sup>                                                 |
| Absorption coefficient           | 0.78 mm <sup>-1</sup>                                                      |
| F(000)                           | 2040                                                                       |
| Crystal size                     | 0.30 x 0.20 x 0.05 mm                                                      |
| Theta range for data collection  | 2 to 23 deg.                                                               |
| Limiting indices                 | 0<=h<=12<br>0<=k<=31<br>-17<=l<=17                                         |
| Reflections collected / unique   | 7228 / 6830 [R(int) = 0.0975]                                              |
| Reflections with I>2sigma(I)     | 3571                                                                       |
| Completeness to theta = 23.00    | 99.8 %                                                                     |
| Abs. correction from psi-scans   | Tmax.=1.00 ,Tmin.=0.81                                                     |
| Refinement method                | Full-matrix on all F <sup>2</sup>                                          |
| Data / restraints / parameters   | 6830 / 186 / 475                                                           |



Goodness-of-fit on  $F^2$             0.987  
Final R indices [ $>2\sigma(I)$ ]     $R1 = 0.075$ ,  $wR2 = 0.140$   
R indices (all data)                 $R1 = 0.169$ ,  $wR2 = 0.178$   
Largest diff. peak and hole         $0.84$  and  $-0.98 \text{ e.}\text{\AA}^{-3}$   
Maximum shift/e.s.d.                 $0.001$

There are two independent molecules; one in a general position and the other on an inversion centre.  
All non-H atoms were anisotropic. In order to prevent some C atoms becoming non-positive-definite, constraints (DELU) were applied to Uij's.

Programs used were :

Data collection - Enraf-Nonius CAD4 software  
Structure solution - SHELXS-97  
Structure refinement - SHELXL-97  
Interactive graphics and final drawings - ORTEP

References :

Enraf-Nonius(1989) CAD4 Software. Version 5.0. Enraf-Nonius, The Netherlands.  
Sheldrick, G.M.(1997) SHELXS-97. Program for Crystal Structure Solution. Univ. of Gottingen, Germany.  
Sheldrick, G.M.(1997) SHELXL-97. Program for Crystal Structure Refinement. Univ. of Gottingen, Germany.

Table 3. Bond lengths [Å] and angles [deg]

|                  |            |                  |            |
|------------------|------------|------------------|------------|
| Pd(1)-P(1)       | 2.428(4)   | Pd(1)-P(2)       | 2.473(3)   |
| Pd(1)-P(3)       | 2.419(3)   | Pd(1)-P(4)       | 2.459(4)   |
| Pd(1)-C(1)       | 2.201(11)  | Pd(1)-C(16)      | 2.219(11)  |
| P(1)-C(1)        | 1.738(11)  | P(1)-C(3)        | 1.848(12)  |
| P(2)-C(1)        | 1.731(12)  | P(2)-C(2)        | 1.853(11)  |
| P(3)-C(16)       | 1.715(12)  | P(3)-C(17)       | 1.864(11)  |
| P(4)-C(16)       | 1.770(11)  | P(4)-C(18)       | 1.823(12)  |
| C(1)-C(4)        | 1.553(15)  | C(2)-C(3)        | 1.349(16)  |
| C(2)-C(8)        | 1.535(16)  | C(3)-C(12)       | 1.584(15)  |
| C(4)-C(6)        | 1.506(16)  | C(4)-C(7)        | 1.531(15)  |
| C(4)-C(5)        | 1.539(15)  | C(8)-C(9)        | 1.523(16)  |
| C(8)-C(11)       | 1.530(15)  | C(8)-C(10)       | 1.555(16)  |
| C(12)-C(13)      | 1.519(17)  | C(12)-C(15)      | 1.523(17)  |
| C(12)-C(14)      | 1.542(16)  | C(16)-C(19)      | 1.537(15)  |
| C(17)-C(18)      | 1.364(16)  | C(17)-C(23)      | 1.552(16)  |
| C(18)-C(27)      | 1.576(15)  | C(19)-C(21)      | 1.515(16)  |
| C(19)-C(22)      | 1.523(17)  | C(19)-C(20)      | 1.540(16)  |
| C(23)-C(25)      | 1.494(16)  | C(23)-C(24)      | 1.521(15)  |
| C(23)-C(26)      | 1.551(16)  | C(27)-C(28)      | 1.521(17)  |
| C(27)-C(29)      | 1.538(16)  | C(27)-C(30)      | 1.542(17)  |
| Pd(2)-C(31)      | 2.211(11)  | Pd(2)-P(5)       | 2.445(3)   |
| Pd(2)-P(6)       | 2.456(3)   | P(5)-C(31)       | 1.753(12)  |
| P(5)-C(32)       | 1.831(11)  | P(6)-C(31)       | 1.752(11)  |
| P(6)-C(33)       | 1.847(12)  | C(31)-C(34)      | 1.525(15)  |
| C(32)-C(33)      | 1.383(15)  | C(32)-C(38)      | 1.539(16)  |
| C(33)-C(42)      | 1.559(15)  | C(34)-C(36)      | 1.493(16)  |
| C(34)-C(37)      | 1.495(17)  | C(34)-C(35)      | 1.519(16)  |
| C(38)-C(39)      | 1.532(16)  | C(38)-C(41)      | 1.540(17)  |
| C(38)-C(40)      | 1.562(17)  | C(42)-C(43)      | 1.519(16)  |
| C(42)-C(44)      | 1.549(17)  | C(42)-C(45)      | 1.560(16)  |
| C(1)-Pd(1)-C(16) | 176.3(4)   | C(1)-Pd(1)-P(3)  | 138.1(3)   |
| C(16)-Pd(1)-P(3) | 43.1(3)    | C(1)-Pd(1)-P(1)  | 43.7(3)    |
| C(16)-Pd(1)-P(1) | 139.8(3)   | P(3)-Pd(1)-P(1)  | 106.12(12) |
| C(1)-Pd(1)-P(4)  | 132.2(3)   | C(16)-Pd(1)-P(4) | 44.1(3)    |
| P(3)-Pd(1)-P(4)  | 73.25(12)  | P(1)-Pd(1)-P(4)  | 172.51(11) |
| C(1)-Pd(1)-P(2)  | 43.0(3)    | C(16)-Pd(1)-P(2) | 136.0(3)   |
| P(3)-Pd(1)-P(2)  | 176.90(11) | P(1)-Pd(1)-P(2)  | 72.97(12)  |
| P(4)-Pd(1)-P(2)  | 108.05(12) | C(1)-P(1)-C(3)   | 96.0(5)    |
| C(1)-P(1)-Pd(1)  | 61.2(4)    | C(3)-P(1)-Pd(1)  | 85.9(4)    |
| C(1)-P(2)-C(2)   | 96.9(5)    | C(1)-P(2)-Pd(1)  | 60.1(4)    |
| C(2)-P(2)-Pd(1)  | 88.2(4)    | C(16)-P(3)-C(17) | 97.8(5)    |
| C(16)-P(3)-Pd(1) | 62.2(4)    | C(17)-P(3)-Pd(1) | 87.3(4)    |
| C(16)-P(4)-C(18) | 96.3(5)    | C(16)-P(4)-Pd(1) | 60.7(4)    |
| C(18)-P(4)-Pd(1) | 87.3(4)    | C(4)-C(1)-P(2)   | 123.1(8)   |
| C(4)-C(1)-P(1)   | 122.5(9)   | P(2)-C(1)-P(1)   | 114.3(6)   |

|                     |            |                     |            |
|---------------------|------------|---------------------|------------|
| C(4)-C(1)-Pd(1)     | 117.6(7)   | P(2)-C(1)-Pd(1)     | 76.9(4)    |
| P(1)-C(1)-Pd(1)     | 75.1(4)    | C(3)-C(2)-C(8)      | 132.9(10)  |
| C(3)-C(2)-P(2)      | 113.3(9)   | C(8)-C(2)-P(2)      | 113.7(8)   |
| C(2)-C(3)-C(12)     | 133.4(11)  | C(2)-C(3)-P(1)      | 116.5(8)   |
| C(12)-C(3)-P(1)     | 109.8(8)   | C(6)-C(4)-C(7)      | 108.9(10)  |
| C(6)-C(4)-C(5)      | 108.3(9)   | C(7)-C(4)-C(5)      | 109.5(10)  |
| C(6)-C(4)-C(1)      | 108.2(9)   | C(7)-C(4)-C(1)      | 112.6(9)   |
| C(5)-C(4)-C(1)      | 109.2(9)   | C(9)-C(8)-C(11)     | 111.1(10)  |
| C(9)-C(8)-C(2)      | 109.5(10)  | C(11)-C(8)-C(2)     | 115.1(10)  |
| C(9)-C(8)-C(10)     | 106.7(11)  | C(11)-C(8)-C(10)    | 102.9(11)  |
| C(2)-C(8)-C(10)     | 111.1(9)   | C(13)-C(12)-C(15)   | 107.7(11)  |
| C(13)-C(12)-C(14)   | 110.0(11)  | C(15)-C(12)-C(14)   | 103.8(9)   |
| C(13)-C(12)-C(3)    | 108.0(9)   | C(15)-C(12)-C(3)    | 110.4(9)   |
| C(14)-C(12)-C(3)    | 116.6(10)  | C(19)-C(16)-P(3)    | 125.2(8)   |
| C(19)-C(16)-P(4)    | 121.6(8)   | P(3)-C(16)-P(4)     | 113.2(6)   |
| C(19)-C(16)-Pd(1)   | 117.9(8)   | P(3)-C(16)-Pd(1)    | 74.6(4)    |
| P(4)-C(16)-Pd(1)    | 75.1(4)    | C(18)-C(17)-C(23)   | 138.3(10)  |
| C(18)-C(17)-P(3)    | 113.0(9)   | C(23)-C(17)-P(3)    | 108.4(8)   |
| C(17)-C(18)-C(27)   | 129.9(11)  | C(17)-C(18)-P(4)    | 116.6(8)   |
| C(27)-C(18)-P(4)    | 113.3(9)   | C(21)-C(19)-C(22)   | 108.6(11)  |
| C(21)-C(19)-C(16)   | 113.3(9)   | C(22)-C(19)-C(16)   | 105.6(10)  |
| C(21)-C(19)-C(20)   | 109.4(10)  | C(22)-C(19)-C(20)   | 108.7(10)  |
| C(16)-C(19)-C(20)   | 111.1(10)  | C(25)-C(23)-C(24)   | 105.8(10)  |
| C(25)-C(23)-C(26)   | 108.6(11)  | C(24)-C(23)-C(26)   | 107.2(10)  |
| C(25)-C(23)-C(17)   | 111.2(10)  | C(24)-C(23)-C(17)   | 118.1(10)  |
| C(26)-C(23)-C(17)   | 105.6(10)  | C(28)-C(27)-C(29)   | 106.5(10)  |
| C(28)-C(27)-C(30)   | 105.0(11)  | C(29)-C(27)-C(30)   | 111.2(11)  |
| C(28)-C(27)-C(18)   | 111.3(10)  | C(29)-C(27)-C(18)   | 112.5(10)  |
| C(30)-C(27)-C(18)   | 109.9(9)   | C(31)-Pd(2)-C(31)'  | 180        |
| C(31)-Pd(2)-P(5)    | 43.9(3)    | C(31)''-Pd(2)-P(5)  | 136.1(3)   |
| C(31)-Pd(2)-P(5)'   | 136.1(3)   | C(31)''-Pd(2)-P(5)' | 43.9(3)    |
| P(5)-Pd(2)-P(5)'    | 180        | C(31)-Pd(2)-P(6)    | 43.7(3)    |
| C(31)''-Pd(2)-P(6)  | 136.3(3)   | P(5)-Pd(2)-P(6)     | 72.77(10)  |
| P(5)''-Pd(2)-P(6)   | 107.23(10) | C(31)-Pd(2)-P(6)'   | 136.3(3)   |
| C(31)''-Pd(2)-P(6)' | 43.7(3)    | P(5)-Pd(2)-P(6)'    | 107.23(10) |
| P(5)''-Pd(2)-P(6)'  | 72.77(10)  | P(6)-Pd(2)-P(6)'    | 180        |
| C(31)-P(5)-C(32)    | 98.0(5)    | C(31)-P(5)-Pd(2)    | 60.9(4)    |
| C(32)-P(5)-Pd(2)    | 89.0(4)    | C(31)-P(6)-C(33)    | 98.1(5)    |
| C(31)-P(6)-Pd(2)    | 60.7(4)    | C(33)-P(6)-Pd(2)    | 88.0(4)    |
| C(34)-C(31)-P(6)    | 123.8(9)   | C(34)-C(31)-P(5)    | 124.1(9)   |
| P(6)-C(31)-P(5)     | 112.0(6)   | C(34)-C(31)-Pd(2)   | 118.6(7)   |
| P(6)-C(31)-Pd(2)    | 75.6(4)    | P(5)-C(31)-Pd(2)    | 75.2(4)    |
| C(33)-C(32)-C(38)   | 130.1(10)  | C(33)-C(32)-P(5)    | 114.9(8)   |
| C(38)-C(32)-P(5)    | 114.9(8)   | C(32)-C(33)-C(42)   | 134.0(11)  |
| C(32)-C(33)-P(6)    | 114.0(8)   | C(42)-C(33)-P(6)    | 111.6(8)   |
| C(36)-C(34)-C(37)   | 110.1(11)  | C(36)-C(34)-C(35)   | 108.1(11)  |
| C(37)-C(34)-C(35)   | 110.3(11)  | C(36)-C(34)-C(31)   | 107.3(10)  |
| C(37)-C(34)-C(31)   | 110.3(10)  | C(35)-C(34)-C(31)   | 110.8(9)   |
| C(39)-C(38)-C(32)   | 113.1(10)  | C(39)-C(38)-C(41)   | 111.0(11)  |
| C(32)-C(38)-C(41)   | 113.5(10)  | C(39)-C(38)-C(40)   | 103.4(11)  |

|                   |           |                   |           |
|-------------------|-----------|-------------------|-----------|
| C(32)-C(38)-C(40) | 109.5(10) | C(41)-C(38)-C(40) | 105.5(11) |
| C(43)-C(42)-C(44) | 110.6(10) | C(43)-C(42)-C(33) | 108.2(10) |
| C(44)-C(42)-C(33) | 115.6(10) | C(43)-C(42)-C(45) | 105.9(10) |
| C(44)-C(42)-C(45) | 106.5(10) | C(33)-C(42)-C(45) | 109.6(9)  |

---

Symmetry transformations used to generate equivalent atoms:

' -x,1-y,-z

**Table 1. Crystal data and structure refinement for [Ni(P2C3tBu3)2]**

|                                   |                                                                            |
|-----------------------------------|----------------------------------------------------------------------------|
| Identification code               | MAR999                                                                     |
| Empirical formula                 | C30 H54 Ni P4                                                              |
| Formula weight                    | 597.3                                                                      |
| Temperature                       | 173(2) K                                                                   |
| Wavelength                        | 0.71073 Å                                                                  |
| Crystal system, space group       | Monoclinic, P2 <sub>1</sub> /c (No.14)                                     |
| Unit cell dimensions(Å and deg.)  | a=17.396(4) alpha=90<br>b= 9.479(2) beta=103.84(3)<br>c=20.102(8) gamma=90 |
| Volume                            | 3219(2) Å <sup>3</sup>                                                     |
| Z, Calculated density             | 4, 1.23 Mg.m <sup>-3</sup>                                                 |
| Absorption coefficient            | 0.82 mm <sup>-1</sup>                                                      |
| F(000)                            | 1288                                                                       |
| Crystal size                      | 0.4 x 0.2 x 0.1 mm                                                         |
| Theta range for data collection   | 2 to 25 deg.                                                               |
| Limiting indices                  | 0<=h<=20<br>0<=k<=11<br>-23<=l<=23                                         |
| Reflections collected / unique    | 5840 / 5652 [R(int) = 0.0380]                                              |
| Reflections with I>2sigma(I)      | 4140                                                                       |
| Completeness to theta = 24.98     | 99.9 %                                                                     |
| Abs. correction from psi-scans    | not applied                                                                |
| Refinement method                 | Full-matrix on all F <sup>2</sup>                                          |
| Data / restraints / parameters    | 5652 / 0 / 316                                                             |
| Goodness-of-fit on F <sup>2</sup> | 1.014                                                                      |

Final R indices [ $>2\sigma(I)$ ] R1 = 0.046, wR2 = 0.094

R indices (all data) R1 = 0.075, wR2 = 0.106

Largest diff. peak and hole 0.41 and -0.32 e.Å<sup>-3</sup>

Maximum shift/e.s.d. 0.001

Programs used were :

Data collection - Enraf-Nonius CAD4 software

Structure solution - SHELXS-97

Structure refinement - SHELXL-97

Interactive graphics and final drawings - ORTEP

References :

Enraf-Nonius(1989) CAD4 Software. Version 5.0. Enraf-Nonius, The Netherlands.

Sheldrick,G.M.(1997) SHELXS-97. Program for Crystal Structure Solution. Univ. of Gottingen, Germany.

Sheldrick,G.M.(1997) SHELXL-97. Program for Crystal

Table 3. Bond lengths [Å] and angles [deg]

---

|                   |           |                   |            |
|-------------------|-----------|-------------------|------------|
| Ni-P(1)           | 2.294(1)  | Ni-P(2)           | 2.260(1)   |
| Ni-C(1)           | 2.014(3)  | Ni-P(3)           | 2.320(1)   |
| Ni-P(4)           | 2.397(1)  | Ni-C(16)          | 2.235(4)   |
| Ni-C(17)          | 2.193(3)  | Ni-C(18)          | 2.149(3)   |
| Ni-M(1)           | 1.736(4)  | P(1)-C(1)         | 1.758(4)   |
| P(1)-C(3)         | 1.869(4)  | P(2)-C(1)         | 1.767(4)   |
| P(2)-C(2)         | 1.884(4)  | P(3)-C(16)        | 1.764(4)   |
| P(3)-C(18)        | 1.789(3)  | P(4)-C(16)        | 1.740(4)   |
| P(4)-C(17)        | 1.800(4)  | C(1)-C(4)         | 1.536(5)   |
| C(2)-C(3)         | 1.348(5)  | C(2)-C(8)         | 1.548(5)   |
| C(3)-C(12)        | 1.556(5)  | C(4)-C(7)         | 1.518(5)   |
| C(4)-C(6)         | 1.523(5)  | C(4)-C(5)         | 1.531(5)   |
| C(8)-C(11)        | 1.524(5)  | C(8)-C(9)         | 1.537(5)   |
| C(8)-C(10)        | 1.544(5)  | C(12)-C(15)       | 1.537(5)   |
| C(12)-C(13)       | 1.540(5)  | C(12)-C(14)       | 1.542(5)   |
| C(16)-C(19)       | 1.537(5)  | C(17)-C(18)       | 1.433(5)   |
| C(17)-C(23)       | 1.570(5)  | C(18)-C(27)       | 1.568(5)   |
| C(19)-C(21)       | 1.520(5)  | C(19)-C(22)       | 1.535(5)   |
| C(19)-C(20)       | 1.538(5)  | C(23)-C(26)       | 1.535(5)   |
| C(23)-C(24)       | 1.539(5)  | C(23)-C(25)       | 1.540(5)   |
| C(27)-C(29)       | 1.531(5)  | C(27)-C(30)       | 1.534(5)   |
| C(27)-C(28)       | 1.542(5)  |                   |            |
| M(1)-Ni-C(1)      | 160.6(1)  | M(1)-Ni-P(2)      | 137.7(1)   |
| M(1)-Ni-P(1)      | 142.1(1)  | C(1)-P(1)-C(3)    | 98.37(16)  |
| C(1)-P(1)-Ni      | 57.82(11) | C(3)-P(1)-Ni      | 99.10(11)  |
| C(1)-P(2)-C(2)    | 99.00(16) | C(1)-P(2)-Ni      | 58.50(11)  |
| C(2)-P(2)-Ni      | 96.90(11) | C(16)-P(3)-C(18)  | 95.93(16)  |
| C(16)-P(4)-C(17)  | 95.76(16) | C(4)-C(1)-P(1)    | 125.4(3)   |
| C(4)-C(1)-P(2)    | 126.5(3)  | P(1)-C(1)-P(2)    | 107.29(19) |
| C(4)-C(1)-Ni      | 126.0(2)  | P(1)-C(1)-Ni      | 74.57(13)  |
| P(2)-C(1)-Ni      | 73.08(13) | C(3)-C(2)-C(8)    | 135.9(3)   |
| C(3)-C(2)-P(2)    | 113.0(3)  | C(8)-C(2)-P(2)    | 111.0(2)   |
| C(2)-C(3)-C(12)   | 131.7(3)  | C(2)-C(3)-P(1)    | 113.4(3)   |
| C(12)-C(3)-P(1)   | 114.6(2)  | C(7)-C(4)-C(6)    | 108.6(3)   |
| C(7)-C(4)-C(5)    | 109.3(3)  | C(6)-C(4)-C(5)    | 109.4(3)   |
| C(7)-C(4)-C(1)    | 112.2(3)  | C(6)-C(4)-C(1)    | 111.6(3)   |
| C(5)-C(4)-C(1)    | 105.6(3)  | C(11)-C(8)-C(9)   | 109.2(3)   |
| C(11)-C(8)-C(10)  | 104.9(3)  | C(9)-C(8)-C(10)   | 107.9(3)   |
| C(11)-C(8)-C(2)   | 116.5(3)  | C(9)-C(8)-C(2)    | 108.6(3)   |
| C(10)-C(8)-C(2)   | 109.3(3)  | C(15)-C(12)-C(13) | 112.2(3)   |
| C(15)-C(12)-C(14) | 105.0(3)  | C(13)-C(12)-C(14) | 105.0(3)   |
| C(15)-C(12)-C(3)  | 115.0(3)  | C(13)-C(12)-C(3)  | 108.2(3)   |
| C(14)-C(12)-C(3)  | 110.9(3)  | C(19)-C(16)-P(4)  | 122.6(3)   |
| C(19)-C(16)-P(3)  | 120.0(3)  | P(4)-C(16)-P(3)   | 116.9(2)   |
| C(18)-C(17)-C(23) | 130.4(3)  | C(18)-C(17)-P(4)  | 116.0(2)   |

|                   |          |                   |          |
|-------------------|----------|-------------------|----------|
| C(23)-C(17)-P(4)  | 113.3(2) | C(17)-C(18)-C(27) | 132.6(3) |
| C(17)-C(18)-P(3)  | 115.3(2) | C(27)-C(18)-P(3)  | 111.8(2) |
| C(21)-C(19)-C(22) | 108.0(3) | C(21)-C(19)-C(16) | 113.0(3) |
| C(22)-C(19)-C(16) | 112.2(3) | C(21)-C(19)-C(20) | 109.1(3) |
| C(22)-C(19)-C(20) | 108.8(3) | C(16)-C(19)-C(20) | 105.6(3) |
| C(26)-C(23)-C(24) | 110.5(3) | C(26)-C(23)-C(25) | 104.8(3) |
| C(24)-C(23)-C(25) | 105.2(3) | C(26)-C(23)-C(17) | 110.2(3) |
| C(24)-C(23)-C(17) | 114.4(3) | C(25)-C(23)-C(17) | 111.1(3) |
| C(29)-C(27)-C(30) | 105.2(3) | C(29)-C(27)-C(28) | 110.3(3) |
| C(30)-C(27)-C(28) | 106.4(3) | C(29)-C(27)-C(18) | 115.4(3) |
| C(30)-C(27)-C(18) | 110.9(3) | C(28)-C(27)-C(18) | 108.4(3) |

M(1) is the centroid of the P(3),P(4),C(16),C(17),C(18) ring

Least-squares planes (x,y,z in crystal coordinates) and deviations from them  
 (\* indicates atom used to define plane)

$$- 11.6032 (0.0154) x - 2.6763 (0.0086) y + 16.6650 (0.0176) z = 1.5922 (0.0074)$$

- \* -0.0250 (0.0009) P1
- \* 0.0247 (0.0009) P2
- \* -0.0524 (0.0019) C2
- \* 0.0526 (0.0019) C3
- 0.5157 (0.0037) C1
- 0.1680 (0.0054) C8
- 0.3543 (0.0054) C12

Rms deviation of fitted atoms = 0.0411

$$- 5.3372 (0.0458) x - 0.2982 (0.0180) y + 20.0422 (0.0116) z = 3.9791 (0.0124)$$

Angle to previous plane (with approximate esd) = 29.61 ( 0.19 )

- \* 0.0000 (0.0000) P1
- \* 0.0000 (0.0000) P2
- \* 0.0000 (0.0000) C1
- 1.7778 (0.0012) Ni
- 0.2129 (0.0092) C4
- 0.7958 (0.0062) C2
- 0.9034 (0.0060) C3

Rms deviation of fitted atoms = 0.0000

$$7.6315 (0.0195) x + 1.5392 (0.0100) y - 19.3608 (0.0109) z = 0.2392 (0.0042)$$

Angle to previous plane (with approximate esd) = 11.34 ( 0.17 )



\* 0.0184 (0.0016) P3  
\* 0.0132 (0.0016) P4  
\* -0.0201 (0.0016) C16  
\* -0.0002 (0.0020) C17  
\* -0.0112 (0.0020) C18  
-1.7341 (0.0016) Ni  
0.1015 (0.0056) C19  
0.1515 (0.0053) C23  
0.0936 (0.0051) C27

Rms deviation of fitted atoms = 0.0144

Least-squares planes (x,y,z in crystal coordinates) and deviations from them  
(\* indicates atom used to define plane)

$$- 9.3639 (0.0278) x - 3.1825 (0.0925) y + 11.6745 (0.0476) z = 1.9056 (0.0324)$$

- \* 0.0175 (0.0031) P1
- \* -0.0170 (0.0030) P2
- \* 0.0370 (0.0066) C2
- \* -0.0375 (0.0068) C3
- 0.2791 (0.0126) C1
- 1.8924 (0.0043) Pd1
- 0.1974 (0.0188) C8
- 0.0208 (0.0186) C12

Rms deviation of fitted atoms = 0.0290

$$- 10.5771 (0.0322) x + 1.1993 (0.1746) y + 8.4932 (0.1522) z = 1.3415 (0.0381)$$

Angle to previous plane (with approximate esd) = 17.27 ( 0.73 )

- \* 0.0000 (0.0001) P1
- \* 0.0000 (0.0001) P2
- \* 0.0000 (0.0000) C1
- 1.9696 (0.0029) Pd1
- 0.0304 (0.0327) C4

Rms deviation of fitted atoms = 0.0000

$$10.6232 (0.0180) x - 3.4276 (0.2109) y - 7.9035 (0.1445) z = 2.1352 (0.0218)$$

Angle to previous plane (with approximate esd) = 5.01 ( 0.67 )

- \* 0.0000 (0.0001) P3
- \* 0.0000 (0.0001) P4
- \* 0.0000 (0.0000) C16
- 1.9549 (0.0032) Pd1
- 0.0083 (0.0326) C19

Rms deviation of fitted atoms = 0.0000

$$9.5868 (0.0252) x + 2.1522 (0.1011) y - 11.3286 (0.0481) z = 1.7928 (0.0331)$$

Angle to previous plane (with approximate esd) = 18.82 ( 0.61 )

\* 0.0057 (0.0030) P3  
\* -0.0060 (0.0032) P4  
\* -0.0122 (0.0065) C17  
\* 0.0125 (0.0067) C18  
0.3094 (0.0128) C16  
-1.8798 (0.0043) Pd1  
0.0664 (0.0182) C23  
0.1587 (0.0187) C27

Rms deviation of fitted atoms = 0.0097

- 0.8449 (0.1198) x + 18.7740 (0.0512) y + 12.0219 (0.0200) z = 7.4145 (0.0261)

Angle to previous plane (with approximate esd) = 67.38 ( 0.62 )

\* 0.0000 (0.0000) P5  
\* 0.0000 (0.0000) P6  
\* 0.0000 (0.0000) C31  
1.9725 (0.0024) Pd2  
-0.0460 (0.0303) C34

Rms deviation of fitted atoms = 0.0000

2.5149 (0.0500) x + 16.8736 (0.0655) y + 11.1201 (0.0351) z = 6.5547 (0.0307)

Angle to previous plane (with approximate esd) = 17.97 ( 0.43 )

\* 0.0060 (0.0031) P5  
\* -0.0059 (0.0030) P6  
\* -0.0125 (0.0064) C32  
\* 0.0124 (0.0064) C33  
-0.3021 (0.0120) C31  
1.8821 (0.0041) Pd2  
-0.1377 (0.0184) C38  
-0.0811 (0.0179) C42

Rms deviation of fitted atoms = 0.0097
